# Supplementary material for: Biofilm Formation by Clostridium ljungdahlii Is Induced by Sodium Chloride Stress: Experimental Evaluation and Transcriptome Analysis
Source: PLoS One. 2017 Jan 24;12(1):e0170406. doi: 10.1371/journal.pone.0170406 (PMC5261816; doi:10.1371/journal.pone.0170406)
Supplement: S1 File — (XLSX) [file pone.0170406.s001.xlsx]

## Sheet: Sheet1
Name	Locus tag	Annotation	Expression planktonic	Expression biofilm	log2 FC	q
trnM1	CLJU_c00110	Met tRNA	83	198	1.25432	1.4656e-14
serS	CLJU_c00170	seryl-tRNA synthetase	111	225	1.01937	1.66846e-11
-	CLJU_c00650	hydrolase	322	703	1.12646	5.40435e-10
-	CLJU_c00660	ketose-bisphosphate aldolase	360	792	1.1375	5.80081e-12
-	CLJU_c00670	hydroxyacid dehydrogenase/reductase-like protein	842	1761	1.0645	1.52951e-06
-	CLJU_c00680	hydroxyacid dehydrogenase/reductase	1016	2276	1.1636	1.99681e-07
-	CLJU_c00720	transcriptional regulator	39	120	1.62149	1.47323e-28
-	CLJU_c00890	hypothetical protein	7	22	1.65208	4.72905e-17
trnK1	CLJU_c01030	Lys tRNA	17	35	1.04182	1.31364e-06
-	CLJU_c01040	HD superfamily hydrolase	8	27	1.75489	3.58482e-26
trnF1	CLJU_c01170	Phe tRNA	11	48	2.12553	3.82127e-35
-	CLJU_c01240	alpha-L-arabinofuranosidase	35	8	-2.12928	1.63041e-38
-	CLJU_c01250	cation symporter	39	10	-1.96347	1.05887e-27
-	CLJU_c01260	sugar ABC transporter periplasmic protein	7	62	3.14684	0
-	CLJU_c01270	sugar ABC transporter ATPase	4	43	3.42626	0
-	CLJU_c01280	sugar ABC transporter permease	6	38	2.66297	2.86161e-147
motA1	CLJU_c01450	chemotaxis protein	189	92	-1.03868	5.38773e-05
motB1	CLJU_c01460	flagellar motor protein MotB	461	200	-1.20477	5.68038e-08
-	CLJU_c01490	hypothetical protein	2598	915	-1.50556	8.53918e-08
-	CLJU_c01530	hypothetical protein	174	1184	2.76651	3.11818e-253
-	CLJU_c01540	transcriptional regulator	655	3151	2.26624	1.34565e-83
-	CLJU_c01550	hypothetical protein	416	2717	2.70736	2.1408e-143
-	CLJU_c01560	hypothetical protein	73	285	1.96499	1.55374e-49
-	CLJU_c01600	polysaccharide deacetylase	25	58	1.21412	1.01732e-12
-	CLJU_c01680	hypothetical protein	27	54	1	6.26058e-08
-	CLJU_c01690	hypothetical protein	101	237	1.23053	1.6404e-14
-	CLJU_c01760	hypothetical protein	59	27	-1.12776	5.80356e-06
ksgA	CLJU_c01770	dimethyladenosine transferase	36	14	-1.36257	2.01477e-10
-	CLJU_c01780	hypothetical protein	42	16	-1.39232	1.9197e-08
-	CLJU_c02080	hypothetical protein	30	13	-1.20645	1.45398e-06
-	CLJU_c02240	hypothetical protein	197	86	-1.19579	3.84434e-08
hemK	CLJU_c02250	modification methylase	140	60	-1.22239	1.8184e-06
-	CLJU_c02310	ribose 5-phosphate isomerase	138	429	1.63631	6.56145e-33
upp	CLJU_c02320	uracil phosphoribosyltransferase	229	617	1.42992	8.98757e-25
-	CLJU_c02330	cytidine deaminase	74	149	1.00972	4.15553e-08
trnT1	CLJU_c02530	Thr tRNA	33	87	1.39855	3.65899e-13
trnY1	CLJU_c02540	Tyr tRNA	106	292	1.4619	1.21064e-23
trnV1	CLJU_c02550	Val tRNA	52	131	1.33298	1.67527e-13
trnY2	CLJU_c02570	Tyr tRNA	234	469	1.00308	1.67409e-09
-	CLJU_c02610	amidophosphoribosyltransferase ComFC	23	10	-1.20163	5.07089e-07
-	CLJU_c02700	hypothetical protein	56	22	-1.34792	1.36246e-09
pssA	CLJU_c02910	phosphatidylserine synthase	1214	526	-1.20663	1.27021e-09
-	CLJU_c02950	hypothetical protein	28	69	1.30117	1.52093e-16
-	CLJU_c02970	magnesium-binding protein	218	1231	2.49743	2.17476e-119
-	CLJU_c03130	hypothetical protein	342	165	-1.05153	3.67722e-05
pfk	CLJU_c03250	6-phosphofructokinase	1066	4290	2.00877	1.03878e-31
pyk	CLJU_c03260	pyruvate kinase	612	2182	1.83405	1.39654e-23
-	CLJU_c03310	restriction-modification system	49	108	1.14018	1.50147e-14
-	CLJU_c03320	type I restriction enzyme, specificity subunit	29	69	1.25054	3.91008e-13
-	CLJU_c03780	patatin-like phospholipase	15	33	1.1375	1.55916e-11
-	CLJU_c03900	hypothetical protein	10	22	1.1375	2.37085e-07
-	CLJU_c03940	hypothetical protein	25	109	2.12433	1.79418e-69
-	CLJU_c04040	ammonium transporter	184	85	-1.11417	2.36008e-07
-	CLJU_c04150	transcriptional regulator	11	31	1.49476	4.92971e-18
maeB	CLJU_c04160	NADP-dependent malic enzyme	116	308	1.40881	6.00602e-24
aspA1	CLJU_c04170	aspartate ammonia-lyase	12	29	1.27302	1.03649e-14
-	CLJU_c04200	sigma factor	147	306	1.05772	5.57895e-12
-	CLJU_c04230	hypothetical protein	17	37	1.12199	1.04045e-10
dapA1	CLJU_c04300	dihydrodipicolinate synthase	24	468	4.2854	0
-	CLJU_c04310	Na+/H+-dicarboxylate symporter	19	516	4.7633	0
-	CLJU_c04320	hypothetical protein	165	2754	4.06099	0
amaA	CLJU_c04420	N-acyl-L-amino acid amidohydrolase	198	89	-1.15362	6.77702e-08
-	CLJU_c04560	signal transduction histidine kinase	49	24	-1.02975	0.000394504
-	CLJU_c04670	hypothetical protein	10	21	1.07039	2.54731e-10
-	CLJU_c04740	protein kinase-like protein	39	19	-1.03747	6.90531e-05
-	CLJU_c04770	methyl-accepting chemotaxis protein	26	5	-2.37851	4.26814e-49
-	CLJU_c04880	peptidase	160	39	-2.03653	4.47145e-44
-	CLJU_c05050	hypothetical protein	4	69	4.10852	0
-	CLJU_c05090	hypothetical protein	85	31	-1.45519	1.70569e-10
-	CLJU_c05210	glycosyltransferase	81	162	1	1.88727e-09
-	CLJU_c05220	glycosyltransferase	105	211	1.00685	3.11565e-11
-	CLJU_c05630	cell wall-binding protein	332	159	-1.06216	3.70229e-07
-	CLJU_c05670	hypothetical protein	44	115	1.38606	2.44966e-18
-	CLJU_c05680	hypothetical protein	60	180	1.58496	5.33465e-30
-	CLJU_c05690	hypothetical protein	41	111	1.43686	2.3103e-25
-	CLJU_c05830	Fe3+-siderophore ABC transporter permease	44	107	1.28204	7.40324e-15
-	CLJU_c05840	Fe3+ ABC transporter ATPase	34	68	1	4.15553e-08
-	CLJU_c05870	hypothetical protein	65	206	1.66413	3.5446e-34
-	CLJU_c05880	glycosylase	73	165	1.1765	2.63265e-15
-	CLJU_c05890	ion transport protein	35	105	1.58496	1.40613e-22
-	CLJU_c05950	hypothetical protein	173	475	1.45716	3.39956e-26
-	CLJU_c05960	hypothetical protein	262	637	1.28173	2.82461e-16
-	CLJU_c06030	methyl-accepting chemotaxis protein	13	30	1.20645	7.90887e-13
-	CLJU_c06140	hypothetical protein	176	79	-1.15565	2.2121e-07
pck	CLJU_c06210	phosphoenolpyruvate carboxykinase	181	1247	2.7844	2.43707e-200
-	CLJU_c06220	undecaprenyl-diphosphatase	90	202	1.16636	1.45225e-14
-	CLJU_c06380	ATPase	31	10	-1.63227	3.29376e-17
-	CLJU_c06390	hypothetical protein	23	5	-2.20163	1.66756e-34
-	CLJU_c06400	acetyltransferase	57	17	-1.74543	8.2539e-21
-	CLJU_c06420	hypothetical protein	20	6	-1.73697	1.74134e-21
-	CLJU_c06450	transcriptional regulatory protein	40	14	-1.51457	1.00669e-11
-	CLJU_c06580	permease	22	10	-1.1375	3.1184e-06
-	CLJU_c06590	ComE-like protein	62	28	-1.14684	2.92333e-05
-	CLJU_c06600	1-acyl-sn-glycerol-3-phosphate acyltransferase	43	17	-1.3388	2.11223e-09
-	CLJU_c06610	(Re)-citrate-synthase	127	28	-2.18133	5.54686e-47
-	CLJU_c06620	aconitate hydratase/aconitase	198	50	-1.9855	1.9054e-34
-	CLJU_c06630	NAD-dependent isocitrate dehydrogenase	154	32	-2.26679	1.20735e-48
-	CLJU_c06640	O-acetylhomoserine sulfhydrylase	119	42	-1.5025	1.64287e-11
metH1	CLJU_c06650	methionine synthase	230	91	-1.3377	2.55268e-12
-	CLJU_c06660	hypothetical protein	257	127	-1.01694	3.90372e-05
argG	CLJU_c06700	argininosuccinate synthase	6808	3413	-0.996191	1.66267e-07
-	CLJU_c06730	transcriptional regulator	55	128	1.21864	1.5351e-12
-	CLJU_c06760	transcriptional regulator	261	130	-1.00554	3.14688e-05
-	CLJU_c06770	xanthine and CO dehydrogenases maturation protein	22	109	2.30875	2.71829e-87
-	CLJU_c06870	hypothetical protein	14	34	1.28011	1.83481e-14
-	CLJU_c07030	NADH dehydrogenase I subunit E	535	1774	1.7294	8.75176e-31
-	CLJU_c07040	NADH dehydrogenase I subunit F	765	2403	1.6513	3.83242e-21
-	CLJU_c07050	NADH dehydrogenase-like protein	595	1790	1.589	1.33927e-25
-	CLJU_c07060	4Fe-4S ferredoxin	959	3242	1.75728	1.79104e-33
-	CLJU_c07070	Fe-Fe hydrogenase 2	677	2057	1.60331	1.03611e-15
hycB	CLJU_c07080	Fe-S-cluster-containing hydrogenase components 2	3207	8002	1.31914	3.17479e-13
-	CLJU_c07110	methyl-accepting chemotaxis protein	177	44	-2.00817	1.70449e-32
pheB	CLJU_c07140	phenylalanine biosynthesis protein	138	38	-1.8606	7.42327e-25
hom1	CLJU_c07150	homoserine dehydrogenase	90	35	-1.36257	1.56003e-09
thrB	CLJU_c07160	homoserine kinase	74	32	-1.20945	6.83365e-06
dacA1	CLJU_c07440	D-alanyl-D-alanine carboxypeptidase	101	49	-1.0435	0.000172296
-	CLJU_c07470	L-seryl-tRNA(Sec) selenium transferase	50	103	1.04264	5.2155e-11
-	CLJU_c07490	hypothetical protein	9	27	1.58496	4.42871e-14
-	CLJU_c07510	cobalamin B12-binding methyltransferase	21	60	1.51457	1.8084e-22
-	CLJU_c07520	corrinoid protein methyltransferase	7	33	2.23704	4.48817e-76
-	CLJU_c07560	cobalamin B12-binding methyltransferase	22	60	1.44746	6.08372e-22
-	CLJU_c07570	corrinoid protein methyltransferase	9	30	1.73697	9.4434e-37
-	CLJU_c07840	two-component sensor histidine kinase	136	18	-2.91754	3.98784e-133
-	CLJU_c07850	hypothetical protein	298	50	-2.57531	1.65562e-86
-	CLJU_c07860	hypothetical protein	43	19	-1.17834	6.65582e-07
grpE	CLJU_c07970	heat shock protein	279	612	1.13327	1.25562e-10
dnaK	CLJU_c07980	molecular chaperone DnaK	385	949	1.30155	2.60002e-15
dnaJ	CLJU_c07990	chaperone protein	286	710	1.3118	6.6049e-19
-	CLJU_c08080	hypothetical protein	98	42	-1.22239	2.15681e-06
-	CLJU_c08430	serine protease	80	657	3.03782	0
-	CLJU_c08520	hydrolase	122	1036	3.08607	0
purE	CLJU_c08540	phosphoribosylaminoimidazole carboxylase	109	800	2.87567	6.7463e-255
purC	CLJU_c08550	phosphoribosylaminoimidazole-succinocarboxamide synthase	120	747	2.63807	3.92476e-200
-	CLJU_c08560	amidophosphoribosyltransferase	119	832	2.80562	2.38678e-248
-	CLJU_c08570	phosphoribosylformylglycinamidine cyclo-ligase	130	778	2.58126	7.39887e-183
purN	CLJU_c08580	folate-dependent phosphoribosylglycinamide formyltransferase PurN	77	318	2.0461	1.06715e-60
purH	CLJU_c08590	bifunctional purine biosynthesis protein PurH	159	847	2.41334	2.99215e-89
purD	CLJU_c08600	phosphoribosylamine-glycine ligase	134	680	2.3433	1.85297e-120
-	CLJU_c08640	hypothetical protein	306	81	-1.91754	4.45522e-23
nhaC	CLJU_c08880	Na(+)/H(+) antiporter	16	51	1.67243	2.6526e-29
-	CLJU_c08930	formate dehydrogenase H	14	33	1.23704	2.90747e-11
napA	CLJU_c08970	Na(+)/H(+) antiporter	82	292	1.83227	8.63473e-54
-	CLJU_c08980	N-acetyltransferase GCN5	420	1097	1.3851	6.03794e-17
-	CLJU_c08990	hypothetical protein	187	553	1.56424	8.9096e-24
-	CLJU_c09000	formylmethanofuran dehydrogenase subunit E	231	638	1.46566	1.4075e-26
-	CLJU_c09020	hypothetical protein	72	174	1.27302	2.60602e-15
leuA	CLJU_c09050	2-isopropylmalate synthase	73	22	-1.73039	1.6096e-19
leuC	CLJU_c09060	3-isopropylmalate dehydratase large subunit	202	57	-1.82532	6.46112e-27
leuD	CLJU_c09070	3-isopropylmalate dehydratase small subunit	129	35	-1.88194	1.53657e-25
leuB1	CLJU_c09080	3-isopropylmalate dehydrogenase	157	41	-1.93707	4.75193e-29
-	CLJU_c09180	two-component sensor histidine kinase	26	9	-1.53051	1.90316e-13
arcA	CLJU_c09270	arginine deiminase ArcA	30	2	-3.90689	5.42237e-273
argF1	CLJU_c09280	ornithine carbamoyltransferase	34	2	-4.08746	0
arcC1	CLJU_c09300	carbamate kinase	22	4	-2.45943	2.81977e-47
murG2	CLJU_c09330	UDP-N-acetylglucosamine--N-acetylmuramyl-(pentapeptide)pyrophosphoryl-undecaprenol N-acetylglucosamine transferase 2	33	66	1	4.72787e-08
flgM	CLJU_c09490	negative regulator of flagellin synthesis	180	72	-1.32193	1.79463e-08
flgL	CLJU_c09520	flagellar hook-associated protein	452	197	-1.19813	1.7759e-09
-	CLJU_c09530	hypothetical protein	261	106	-1.29999	1.94287e-08
-	CLJU_c09540	carbon storage regulator	818	333	-1.29658	2.38431e-09
flaG	CLJU_c09550	flagellar protein	410	184	-1.15592	2.28747e-06
-	CLJU_c09560	hypothetical protein	531	223	-1.25167	6.41862e-08
fliS	CLJU_c09570	flagellar protein FliS	615	278	-1.1455	6.64044e-08
fliD2	CLJU_c09610	flagellar hook-associated protein	32	5	-2.67807	2.64532e-92
-	CLJU_c09620	hypothetical protein	26	5	-2.37851	4.16277e-49
-	CLJU_c09630	flagellin protein	73	19	-1.9419	3.56967e-26
flaB1	CLJU_c09710	flagellin B	17645	3637	-2.27844	6.34302e-43
-	CLJU_c09730	glycosyltransferase	65	28	-1.21501	1.23341e-06
-	CLJU_c09740	hypothetical protein	151	53	-1.51048	1.19343e-14
-	CLJU_c09750	hypothetical protein	153	52	-1.55695	1.22642e-17
-	CLJU_c10020	membrane-associated protein	85	18	-2.23947	2.51156e-42
-	CLJU_c10030	hypothetical protein	1089	238	-2.19397	6.32419e-49
-	CLJU_c10040	hypothetical protein	860	198	-2.11884	5.27956e-40
-	CLJU_c10050	hypothetical protein	216	54	-2	4.22977e-33
-	CLJU_c10080	hypothetical protein	649	325	-0.997779	2.63906e-06
hom2	CLJU_c10090	homoserine dehydrogenase	847	143	-2.56635	1.46755e-104
flaB2	CLJU_c10180	flagellin subunit protein B	516	227	-1.18468	1.34134e-08
-	CLJU_c10520	GTP-binding protein	265	548	1.04818	1.2322e-09
dapF	CLJU_c10760	diaminopimelate epimerase	107	315	1.55774	5.46883e-32
-	CLJU_c10770	hypothetical protein	31	85	1.45519	2.23177e-19
crp1	CLJU_c10830	CRP protein	20	10	-1	0.000107836
-	CLJU_c10870	two-component sensor histidine kinase	29	83	1.51706	2.94747e-22
glyA	CLJU_c11500	serine hydroxymethyltransferase	636	267	-1.25219	6.77205e-11
purL	CLJU_c11540	bifunctional enzyme phosphoribosylformylglycinamidine (FGAM) synthase	40	148	1.88753	7.66081e-54
hisZ	CLJU_c11660	ATP phosphoribosyltransferase, regulatory subunit	19	203	3.41741	0
hisG	CLJU_c11670	ATP phosphoribosyltransferase	18	130	2.85244	1.85909e-258
hisD	CLJU_c11680	histidinol dehydrogenase	25	170	2.76553	2.10279e-181
hisB	CLJU_c11690	imidazole glycerol-phosphate dehydratase	19	137	2.8501	3.90789e-268
hisH	CLJU_c11700	imidazole glycerol phosphate synthase subunit	20	134	2.74416	5.76019e-199
hisA	CLJU_c11710	1-(5-phosphoribosyl)-5-[(5-phosphoribosylamino)methylideneamino] imidazole-4-carboxamide isomerase	27	127	2.2338	2.7654e-84
-	CLJU_c11720	histidinol-phosphate aminotransferase	15	71	2.24286	6.01985e-82
hisF	CLJU_c11730	imidazole glycerol phosphate synthase subunit	27	123	2.18763	7.94716e-74
hisI	CLJU_c11740	phosphoribosyl-AMP cyclohydrolase	20	85	2.08746	1.0233e-59
hisE	CLJU_c11750	phosphoribosyl-ATP pyrophosphatase	37	127	1.77923	1.51454e-38
-	CLJU_c11760	hypothetical protein	60	172	1.51937	6.4429e-22
-	CLJU_c11770	two-component response regulator	144	327	1.18322	6.54983e-17
pflB1	CLJU_c11830	pyruvate formate-lyase	12	51	2.08746	3.07955e-50
-	CLJU_c11870	ethanolamine utilization protein	7	31	2.14684	4.95189e-70
-	CLJU_c11880	ethanol dehydrogenase	6	31	2.36923	4.5837e-100
-	CLJU_c11890	major intrinsic protein, aquaporin	7	28	2	3.72833e-57
eutT1	CLJU_c11900	ethanolamine utilization cobalamin adenosyltransferase	8	24	1.58496	5.79023e-27
eutN1	CLJU_c11930	ethanolamine utilization protein EutN	10	26	1.37851	2.76177e-12
-	CLJU_c11960	acetaldehyde dehydrogenase	16	35	1.12928	2.54731e-10
pduL1	CLJU_c11970	propanediol utilization protein	13	29	1.15754	6.36318e-13
-	CLJU_c12020	transcriptional regulator	37	14	-1.4021	1.24251e-09
dppB	CLJU_c12050	dipeptide ABC transporter permease	35	15	-1.22239	1.90115e-07
-	CLJU_c12090	dipeptidase	29	11	-1.39855	4.14822e-12
pilT	CLJU_c12270	twitching motility protein	55	21	-1.38904	6.56452e-09
-	CLJU_c12350	transcriptional regulator	254	111	-1.19427	3.42821e-06
fmt	CLJU_c12570	methionyl-tRNA formyltransferase	161	366	1.18478	1.62238e-15
-	CLJU_c12580	zinc-dependent metalloprotease	67	140	1.06319	3.54202e-10
-	CLJU_c12660	hypothetical protein	249	634	1.34834	1.29062e-16
pta	CLJU_c12770	phosphotransacetylase	1147	2900	1.33819	2.63588e-10
ackA	CLJU_c12780	acetate kinase	1145	2834	1.30749	5.26709e-11
-	CLJU_c12830	dsRNA-specific ribonuclease	36	76	1.078	4.36318e-10
-	CLJU_c12870	hypothetical protein	516	258	-1	6.52953e-05
rimM	CLJU_c12910	16S rRNA processing protein	487	176	-1.46835	3.16492e-14
-	CLJU_c12920	tRNA (guanine-N1)-methyltransferase	280	104	-1.42884	1.07345e-12
-	CLJU_c13220	zinc-dependent protease	193	92	-1.0689	2.50448e-07
-	CLJU_c13230	hypothetical protein	66	29	-1.18641	2.50902e-06
ftsK	CLJU_c13250	DNA translocase	47	22	-1.09516	6.85295e-05
-	CLJU_c13290	hypothetical protein	3625	1714	-1.08061	2.39904e-07
-	CLJU_c13400	glyceraldehyde-3-phosphate dehydrogenase	235	2347	3.32009	0
-	CLJU_c13460	methyl-accepting chemotaxis protein	43	10	-2.10434	7.38116e-28
-	CLJU_c13610	KDPG and KHG aldolase	13	32	1.29956	1.58977e-16
-	CLJU_c13740	transcriptional regulator	52	24	-1.11548	7.94883e-06
-	CLJU_c13750	hypothetical protein	46	22	-1.06413	0.000332184
-	CLJU_c13760	methyl-accepting chemotaxis protein	29	4	-2.85798	1.36139e-107
-	CLJU_c13850	hypothetical protein	338	703	1.0565	2.23278e-12
-	CLJU_c13870	sodium:solute symporter	161	66	-1.28652	4.06971e-10
-	CLJU_c13960	ferrous iron transport protein A	70	402	2.52177	2.02499e-137
-	CLJU_c13970	FeoA-like protein	28	144	2.36257	2.4728e-102
feoB1	CLJU_c13980	ferrous iron transport protein	14	108	2.94753	3.01447e-236
-	CLJU_c13990	hypothetical protein	10	136	3.76553	0
-	CLJU_c14000	flavodoxin, short chain	10	176	4.1375	0
-	CLJU_c14010	hypothetical protein	4	88	4.45943	0
-	CLJU_c14110	methyl-accepting chemotaxis protein	22	62	1.49476	1.68207e-21
-	CLJU_c14620	hypothetical protein	406	73	-2.47551	6.15358e-74
aroH	CLJU_c14780	phospho-2-dehydro-3-deoxyheptonate aldolase	188	48	-1.96963	1.70467e-30
-	CLJU_c14820	major facilitator family transporter	125	31	-2.01159	2.77184e-34
-	CLJU_c14830	hypothetical protein	76	32	-1.24793	4.06048e-06
-	CLJU_c14840	transport/signal transduction system protein	116	44	-1.39855	8.73736e-13
-	CLJU_c14990	NADH:flavin oxidoreductase	5	38	2.926	4.65041e-246
dhaT1	CLJU_c15000	1,3-propanediol dehydrogenase	5	35	2.80735	1.32593e-201
-	CLJU_c15010	transcriptional regulator	10	25	1.32193	5.49735e-19
ilvE2	CLJU_c15090	threonine dehydratase	47	17	-1.46713	9.75887e-10
-	CLJU_c15160	transcriptional regulator	35	10	-1.80735	1.01941e-19
-	CLJU_c15170	ABC transporter-like ATPase/permease	34	8	-2.08746	6.25017e-33
-	CLJU_c15180	ABC transporter ATPase/permease	37	10	-1.88753	1.3616e-19
-	CLJU_c15230	Na+-driven multidrug efflux pump	105	4	-4.71425	0
-	CLJU_c15240	transcriptional regulator	25	5	-2.32193	6.54405e-41
-	CLJU_c15360	Zn-ribbon nucleic-acid-binding protein	1120	313	-1.83926	1.14146e-26
-	CLJU_c15370	NAD(P)H:flavin oxidoreductase	997	259	-1.94464	7.97272e-36
-	CLJU_c15630	hypothetical protein	32	12	-1.41504	1.77429e-09
-	CLJU_c15890	hypothetical protein	167	848	2.34422	9.84875e-122
-	CLJU_c15900	hypothetical protein	149	493	1.72628	4.59651e-39
-	CLJU_c15990	divalent cation transporter	13	87	2.7425	8.3905e-177
-	CLJU_c16000	divalent cation transporter	13	85	2.70895	1.92071e-187
-	CLJU_c16040	PadR family transcriptional regulator	42	15	-1.48543	1.27138e-12
-	CLJU_c16050	iron-sulfur flavoprotein	22	11	-1	0.00023217
trpE	CLJU_c16070	anthranilate synthase component I	58	8	-2.85798	5.3335e-119
trpG	CLJU_c16080	anthranilate synthase component II	46	6	-2.9386	4.53746e-105
trpD	CLJU_c16090	anthranilate phosphoribosyltransferase	54	10	-2.43296	1.26066e-70
trpC	CLJU_c16100	indole-3-glycerol phosphate synthase	39	6	-2.70044	2.13479e-95
trpF	CLJU_c16110	N-(5'-phosphoribosyl)anthranilate isomerase	63	8	-2.97728	5.46986e-133
trpB	CLJU_c16120	tryptophan synthase subunit beta	73	15	-2.28293	2.69394e-46
trpA	CLJU_c16130	tryptophan synthase subunit alpha	67	17	-1.97863	2.64817e-34
fur3	CLJU_c16280	Fe2+/Zn2+ uptake regulation protein	27	71	1.39486	5.39793e-20
-	CLJU_c16290	methyl-accepting chemotaxis protein	46	118	1.35908	2.85502e-18
-	CLJU_c16300	MarR family transcriptional regulator	27	74	1.45457	6.18429e-21
-	CLJU_c16320	transcriptional regulator	88	203	1.2059	9.84842e-13
-	CLJU_c16330	hypothetical protein	5	36	2.848	5.70512e-105
-	CLJU_c16340	cyanate permease	3	28	3.22239	0
-	CLJU_c16410	mandelate racemase/muconate lactonizing family protein	5	22	2.1375	3.24986e-53
-	CLJU_c16420	amino acid permease	7	24	1.77761	1.18355e-37
-	CLJU_c16430	beta-lactamase	18	64	1.83007	7.17897e-39
adhE1	CLJU_c16510	bifunctional aldehyde/alcohol dehydrogenase	1310	36	-5.18543	0
-	CLJU_c16660	hypothetical protein	20	9	-1.152	3.17473e-05
-	CLJU_c16710	hypothetical protein	26	6	-2.11548	1.33196e-31
-	CLJU_c16960	hypothetical protein	47	23	-1.03103	0.000114972
-	CLJU_c16980	hypothetical protein	68	24	-1.5025	9.53228e-14
-	CLJU_c17010	rubrerythrin	109	247	1.18018	7.87092e-14
-	CLJU_c17070	aldo/keto reductase	15	61	2.02385	4.67333e-55
-	CLJU_c17080	hypothetical protein	56	340	2.60204	9.15494e-161
-	CLJU_c17100	ABC transporter	4	23	2.52356	1.35421e-97
-	CLJU_c17110	molybdenum cofactor biosynthesis family protein	3	48	4	0
-	CLJU_c17120	ABC transporter	2	38	4.24793	0
-	CLJU_c17130	ABC transporter permease	2	25	3.64386	0
-	CLJU_c17140	nucleotide kinase-like protein	4	40	3.32193	0
-	CLJU_c17150	ABC transporter	5	44	3.1375	2.31723e-253
-	CLJU_c17160	ABC transporter ATPase	4	26	2.70044	1.20608e-88
-	CLJU_c17170	Fe3+ ABC transporter periplasmic protein	6	21	1.80735	1.26702e-29
-	CLJU_c17210	nickel-binding GTPase	12	35	1.54432	1.60993e-25
-	CLJU_c17220	ABC transporter ATPase	8	21	1.39232	4.54631e-17
-	CLJU_c17230	hypothetical protein	8	21	1.39232	1.95324e-18
-	CLJU_c17250	ABC transporter	18	39	1.11548	4.64985e-12
-	CLJU_c17280	Fe-Fe hydrogenase 2	11	23	1.06413	2.70585e-10
gltB	CLJU_c17370	glutamate synthaselarge subunit	198	67	-1.56327	1.31132e-19
gltD	CLJU_c17380	glutamate synthasesmall subunit	318	101	-1.65467	9.84016e-20
-	CLJU_c17390	succinyl-diaminopimelate desuccinylase	695	1625	1.22535	4.70177e-08
-	CLJU_c17660	transcriptional regulator	63	11	-2.51785	1.03199e-67
panE	CLJU_c17690	ketopantoate reductase PanE/ApbA	77	241	1.6461	1.86515e-34
-	CLJU_c17700	LysR family transcriptional regulator	37	9	-2.03953	2.05836e-29
asn	CLJU_c17710	asparagine synthetase	356	129	-1.46451	9.57986e-16
-	CLJU_c17720	LysR family transcriptional regulator	126	23	-2.45372	1.13162e-61
-	CLJU_c17780	phosphatase	56	137	1.29068	1.80409e-14
def4	CLJU_c17840	peptide deformylase	188	34	-2.46713	1.52434e-72
-	CLJU_c17900	amino acid permease	190	85	-1.16046	1.42273e-08
-	CLJU_c17940	hypothetical protein	57	11	-2.37346	2.13639e-68
-	CLJU_c17950	molybdopterin biosynthesis protein	63	11	-2.51785	3.32466e-76
-	CLJU_c17960	hypothetical protein	112	56	-1	4.46592e-06
-	CLJU_c18000	nitroreductase	61	381	2.64291	4.59853e-145
dapB1	CLJU_c18050	dihydrodipicolinate reductase	45	11	-2.03242	4.32226e-36
cdd	CLJU_c18120	cytidine deaminase	891	236	-1.91664	7.33081e-31
deoC	CLJU_c18130	deoxyribose-phosphate aldolase	643	189	-1.76643	1.71002e-27
-	CLJU_c18140	concentrative nucleoside transporter	319	99	-1.68806	1.16969e-22
deoB	CLJU_c18150	phosphopentomutase	725	222	-1.70742	3.07427e-26
pdp	CLJU_c18160	pyrimidine-nucleoside phosphorylase	2132	651	-1.71148	1.05275e-11
-	CLJU_c18170	hypothetical protein	41	13	-1.65711	1.89717e-11
-	CLJU_c18300	hypothetical protein	27	9	-1.58496	5.61008e-11
-	CLJU_c18350	ABC transporter ATP-binding protein	26	62	1.25376	5.24274e-15
-	CLJU_c18360	ABC transporter permease	31	76	1.29373	2.15985e-13
-	CLJU_c18370	hydrolase	22	52	1.24101	6.78953e-15
-	CLJU_c18380	hypothetical protein	18	84	2.22239	6.56364e-80
-	CLJU_c18470	iron-containing alcohol dehydrogenase	711	1478	1.05572	5.63727e-07
-	CLJU_c18670	methyl-accepting chemotaxis protein	45	10	-2.16993	6.01889e-33
-	CLJU_c18700	hypothetical protein	13	32	1.29956	2.73957e-17
-	CLJU_c18800	hypothetical protein	46	15	-1.61667	4.98804e-17
-	CLJU_c18890	transcriptional regulator	125	55	-1.18442	1.71231e-05
-	CLJU_c19020	ABC transporter ATPase	30	5	-2.58496	4.69637e-87
-	CLJU_c19090	uroporphyrinogen decarboxylase-like protein	47	12	-1.96963	9.60933e-34
hemE	CLJU_c19100	uroporphyrinogen decarboxylase	72	18	-2	1.98738e-27
-	CLJU_c19110	cobalamin B12-binding protein	102	26	-1.97199	1.21288e-28
-	CLJU_c19120	uroporphyrinogen decarboxylase-like protein	85	21	-2.01707	5.08017e-26
-	CLJU_c19130	ferredoxin-containing protein	61	21	-1.53842	1.34906e-13
-	CLJU_c19150	hypothetical protein	758	254	-1.57737	1.45511e-19
-	CLJU_c19220	nucleoside transporter family protein	29	10	-1.53605	2.34868e-13
-	CLJU_c19230	cytosine deaminase	92	30	-1.61667	1.41742e-15
pepT2	CLJU_c19310	peptidase T	18	1158	6.00749	0
-	CLJU_c19320	amino acid permease	25	1433	5.84097	0
ftn	CLJU_c19490	ferritin	39	8	-2.2854	2.57489e-38
-	CLJU_c19590	transcriptional regulator	393	55	-2.83703	1.97063e-145
-	CLJU_c19600	transcriptional regulator	299	38	-2.97607	8.50483e-171
-	CLJU_c19730	hypothetical protein	25	8	-1.64386	9.04286e-15
-	CLJU_c19750	hypothetical protein	66	31	-1.0902	2.05585e-05
-	CLJU_c19770	heat shock protein HtpG	73	249	1.77018	2.39953e-45
-	CLJU_c19800	hypothetical protein	159	27	-2.558	3.95508e-71
-	CLJU_c19850	glyoxalase	65	23	-1.49881	3.85446e-14
-	CLJU_c19860	glycosylhydrolase	32	5	-2.67807	8.23627e-112
-	CLJU_c19870	hypothetical protein	346	114	-1.60174	8.58957e-18
-	CLJU_c20010	hypothetical protein	58	27	-1.10309	7.89091e-06
-	CLJU_c20060	hypothetical protein	21	6	-1.80735	2.70472e-17
-	CLJU_c20130	sigma-54- interacting transcriptional regulator	44	17	-1.37197	2.59536e-09
etfB2	CLJU_c20330	electron transfer flavoprotein subunit beta	605	113	-2.42061	3.66528e-76
etfA2	CLJU_c20340	electron transfer flavoprotein subunit alpha	701	134	-2.38718	1.30014e-77
-	CLJU_c20350	FAD/FMN-containing dehydrogenase	477	94	-2.34326	1.96645e-72
-	CLJU_c20360	2-dehydropantoate 2-reductase	290	59	-2.29727	8.30866e-53
ilvC2	CLJU_c20390	ketol-acid reductoisomerase	1063	195	-2.4466	1.96962e-89
ilvC3	CLJU_c20400	ketol-acid reductoisomerase	1152	211	-2.44883	1.34261e-92
ilvD	CLJU_c20410	dihydroxy-acid dehydratase	794	113	-2.81282	4.12682e-157
ilvI	CLJU_c20420	acetolactate synthaselarge subunit	318	65	-2.29052	3.16762e-62
ilvH	CLJU_c20430	acetolactate synthasesmall subunit	174	38	-2.19502	8.115e-44
accC1	CLJU_c20450	biotin carboxylase	26	6	-2.11548	3.33216e-42
-	CLJU_c20510	hypothetical protein	22	7	-1.65208	1.3707e-13
-	CLJU_c20530	Na+/solute symporter: sodium/proline symporter family protein	51	10	-2.3505	7.88722e-51
metH4	CLJU_c20620	methionine synthase	51	133	1.38286	3.39864e-17
-	CLJU_c20630	hypothetical protein	41	88	1.10188	2.424e-09
cobW	CLJU_c20640	CobW-like protein	39	88	1.17403	1.32303e-12
-	CLJU_c20650	hypothetical protein	26	60	1.20645	3.39218e-16
-	CLJU_c20660	hypothetical protein	55	160	1.54057	1.50863e-21
-	CLJU_c20670	corrinoid protein	50	129	1.36737	1.87869e-15
-	CLJU_c20680	uroporphyrinogen-III decarboxylase-like protein	39	117	1.58496	2.08007e-25
metH5	CLJU_c20690	methionine synthase	58	153	1.39941	1.7577e-18
-	CLJU_c20700	corrinoid protein	59	212	1.84528	9.76566e-39
-	CLJU_c20710	uroporphyrinogen-III decarboxylase-like protein	77	230	1.5787	3.53415e-32
-	CLJU_c20770	two-component response regulator	24	10	-1.26303	3.11611e-08
-	CLJU_c20790	sodium:dicarboxylate symporter	55	4	-3.78136	0
-	CLJU_c20880	GGDEF domain sensor protein	61	30	-1.02385	0.000260027
-	CLJU_c20970	hypothetical protein	35	114	1.70361	1.86999e-33
lexA	CLJU_c21030	LexA repressor	358	101	-1.8256	3.73663e-25
dinB	CLJU_c21040	DNA polymerase IV	218	58	-1.9102	1.81224e-30
-	CLJU_c21200	aluminum resistance protein	66	18	-1.87447	3.53549e-21
mutL1	CLJU_c21230	DNA mismatch repair protein MutL	113	54	-1.06529	1.9259e-06
mutS1	CLJU_c21240	DNA mismatch repair protein MutS	100	44	-1.18442	7.97348e-09
-	CLJU_c21250	MiaB protein	176	84	-1.06711	6.20919e-07
-	CLJU_c21270	class I/II aminotransferase	819	206	-1.99122	5.02495e-43
-	CLJU_c21280	hypothetical protein	632	181	-1.80393	1.49049e-19
aspC2	CLJU_c21290	aspartate aminotransferase	436	116	-1.9102	7.36708e-33
-	CLJU_c21440	formiminotransferase-cyclodeaminase	137	10	-3.7761	0
-	CLJU_c21450	aminoacid permease	198	16	-3.62936	0
-	CLJU_c21460	histidine ammonia-lyase	408	12	-5.08746	0
-	CLJU_c21470	imidazolonepropionase	505	9	-5.81021	0
-	CLJU_c21480	urocanate hydratase	741	10	-6.2114	0
-	CLJU_c21500	glutamate formiminotransferase	876	28	-4.96743	0
argD	CLJU_c21510	acetylornithine aminotransferase	843	308	-1.4526	8.06424e-17
argB	CLJU_c21520	acetylglutamate kinase	1003	323	-1.63472	4.63116e-23
argJ	CLJU_c21530	arginine biosynthesis bifunctional protein	1103	356	-1.63148	1.66768e-21
argC	CLJU_c21540	N-acetyl-gamma-glutamyl-phosphate reductase	525	183	-1.52047	2.18559e-16
-	CLJU_c21570	FAD/FMN-containing dehydrogenase	7	32	2.19265	5.63339e-83
-	CLJU_c21580	electron transfer flavoprotein subunit alpha	4	21	2.39232	3.0722e-87
-	CLJU_c21720	aminohydrolase	52	23	-1.17688	1.12699e-05
-	CLJU_c21730	spermidine/putrescine ABC transporter periplasmic protein	40	18	-1.152	8.17556e-06
-	CLJU_c21740	spermidine/putrescine ABC transporter permease	34	15	-1.18057	1.5195e-06
-	CLJU_c21760	spermidine/putrescine ABC transporter ATPase	35	16	-1.12928	3.0755e-05
-	CLJU_c21780	hypothetical protein	27	6	-2.16993	1.30902e-26
-	CLJU_c21810	amino acid permease	70	144	1.04064	1.9737e-12
mutS2	CLJU_c21820	DNA mismatch repair protein MutS	227	106	-1.09863	4.26142e-07
-	CLJU_c21850	hypothetical protein	136	60	-1.18057	3.12272e-06
ribH	CLJU_c22060	riboflavin synthase subunit beta	30	14	-1.09954	2.23302e-05
ribAB	CLJU_c22070	riboflavin biosynthesis protein	25	10	-1.32193	4.91704e-09
-	CLJU_c22150	molybdate ABC transporter ATPase	26	101	1.95777	1.72384e-43
modB	CLJU_c22160	molybdate-binding extracellular protein	42	201	2.25873	4.15588e-72
modA1	CLJU_c22170	molybdate-binding extracellular protein	143	709	2.30977	4.0288e-115
-	CLJU_c22210	bifunctional AICARFT/IMPCHase	123	1095	3.1542	0
-	CLJU_c22340	surface/cell-adhesion protein	28	4	-2.80735	2.38938e-113
-	CLJU_c22470	hypothetical protein	12	38	1.66297	2.88279e-19
-	CLJU_c22520	Na+-driven multidrug efflux pump	175	748	2.09568	1.45971e-52
-	CLJU_c22530	methyltransferase	229	932	2.02498	1.98294e-65
-	CLJU_c22540	peptide ABC transporter periplasmic protein	251	980	1.96509	3.65452e-54
-	CLJU_c22550	hypothetical protein	438	1782	2.02449	9.76107e-63
-	CLJU_c22560	peptide ABC transporter ATPase	225	914	2.02227	2.64923e-45
-	CLJU_c22570	peptide ABC transporter ATPase	373	1352	1.85785	4.65021e-47
-	CLJU_c22580	peptide ABC transporter periplasmic protein	281	985	1.80955	4.91874e-38
-	CLJU_c22590	peptide ABC transporter permease	163	555	1.76762	5.37258e-46
-	CLJU_c22600	peptide ABC transporter permease	141	570	2.01527	7.6201e-70
-	CLJU_c22610	hypothetical protein	675	2742	2.02227	1.60498e-45
-	CLJU_c22620	methyltransferase	715	1935	1.43632	3.16863e-19
-	CLJU_c22630	peptide ABC transporter ATPase	198	1725	3.12302	0
-	CLJU_c22640	peptide ABC transporter ATPase	138	1234	3.1606	0
-	CLJU_c22650	peptide ABC transporter permease	177	1600	3.17625	0
-	CLJU_c22660	peptide ABC transporter permease	410	3502	3.09448	0
-	CLJU_c22670	peptide ABC transporter periplasmic protein	416	2943	2.82263	1.51611e-206
-	CLJU_c22680	sigma-54-interacting transcriptional regulator	58	285	2.29684	4.41006e-109
-	CLJU_c22690	methyltransferase	97	817	3.07428	0
-	CLJU_c22700	hypothetical protein	70	549	2.97138	2.18741e-262
-	CLJU_c22910	methyl-accepting chemotaxis protein	82	26	-1.65711	1.78099e-16
hypD	CLJU_c23070	hydrogenase expression/formation protein HypD	296	145	-1.02954	3.35043e-05
hypC	CLJU_c23080	hydrogenase expression/formation protein	759	338	-1.16708	1.00436e-06
hypF	CLJU_c23090	hydrogenase maturation protein HypF	257	128	-1.00562	4.96305e-06
-	CLJU_c23100	hypothetical protein	289	131	-1.1415	2.90055e-07
-	CLJU_c23110	nitrogenase iron-molybdenum cofactor biosynthesis protein	266	119	-1.16046	8.50564e-07
nifH3	CLJU_c23120	nitrogenase iron protein	159	67	-1.24679	5.22794e-07
-	CLJU_c23190	FAD/FMN-containing dehydrogenase	45	22	-1.03242	0.000254154
-	CLJU_c23200	hypothetical protein	371	85	-2.12588	6.40289e-45
-	CLJU_c23220	zinc-containing alcohol dehydrogenase superfamily	562	1653	1.55644	2.45337e-24
-	CLJU_c23270	secretion protein	153	63	-1.28011	1.3759e-09
-	CLJU_c23280	cation/multidrug efflux pump	172	78	-1.14086	2.44172e-08
-	CLJU_c23320	hypothetical protein	66	140	1.08489	3.78956e-11
ilvB	CLJU_c23420	acetolactate synthaselarge subunit	344	89	-1.95053	7.69489e-33
-	CLJU_c23430	amino acid permease	21	1	-4.39232	0
arcC2	CLJU_c23800	carbamate kinase	314	143	-1.13475	1.76698e-07
-	CLJU_c23810	deacetylase	624	289	-1.11048	4.68505e-08
-	CLJU_c23820	amidohydrolase	414	181	-1.19364	1.83908e-09
-	CLJU_c23830	oxidoreductase Fe-S subunit	344	163	-1.07754	2.59992e-07
-	CLJU_c23840	ornithine/aspartate carbamoyltransferase	422	198	-1.09174	1.17124e-07
-	CLJU_c23940	adenine deaminase	46	14	-1.71621	1.78275e-15
-	CLJU_c23950	permease	76	7	-3.44057	0
-	CLJU_c23960	guanine deaminase	126	17	-2.88982	1.9239e-125
-	CLJU_c24060	sigma-54-interacting transcriptional regulator	70	20	-1.80735	1.18538e-22
-	CLJU_c24070	molybdenum dehydrogenase accessory protein	130	38	-1.77444	1.77901e-22
-	CLJU_c24080	radical SAM domain-containing protein	99	22	-2.16993	4.38283e-41
-	CLJU_c24090	hypothetical protein	127	21	-2.59637	9.19732e-95
-	CLJU_c24100	methyltransferase type 11	148	22	-2.75002	1.42742e-108
-	CLJU_c24110	hypothetical protein	154	29	-2.40881	4.96783e-64
-	CLJU_c24120	Fe-S oxidoreductase	139	16	-3.11894	1.74716e-215
-	CLJU_c24130	aldehyde oxidoreductase	526	69	-2.93039	1.42012e-191
-	CLJU_c24140	sigma-54-interacting transcriptional regulator	64	19	-1.75207	1.51148e-20
gcvPB	CLJU_c24150	glycine dehydrogenase subunit 2	1256	444	-1.5002	3.2416e-15
gcvPA	CLJU_c24160	glycine dehydrogenase subunit 1	1196	429	-1.47917	1.46864e-14
gcvH1	CLJU_c24170	glycine cleavage system H protein	1110	389	-1.51272	7.38326e-15
gcvT	CLJU_c24180	aminomethyltransferase	1504	512	-1.55459	1.22623e-16
-	CLJU_c24190	NADPH-dependent glutamate synthase subunit beta	4249	1400	-1.6017	2.98361e-14
-	CLJU_c24210	hypothetical protein	23	55	1.2578	1.95364e-15
-	CLJU_c24240	NADH oxidase	437	213	-1.03678	1.25995e-06
-	CLJU_c24250	aminoacid permease	70	2	-5.12928	0
-	CLJU_c24260	cyclase	218	14	-3.96083	0
-	CLJU_c24320	aminoacid transporter	120	20	-2.58496	2.06926e-78
metA	CLJU_c24330	homoserine O-succinyltransferase	299	64	-2.224	3.65479e-49
-	CLJU_c24480	hypothetical protein	30	15	-1	0.000547891
-	CLJU_c24750	cell wall-binding protein	121	43	-1.4926	9.24267e-15
-	CLJU_c24860	zinc-containing alcohol dehydrogenase	14	72	2.36257	2.30597e-91
-	CLJU_c24890	heavy-metal-binding protein	122	334	1.45297	5.75023e-20
-	CLJU_c24940	hypothetical protein	4	27	2.75489	8.81893e-106
-	CLJU_c25010	extracellular amino acid-binding protein	689	97	-2.82845	2.95855e-150
-	CLJU_c25020	hypothetical protein	25	7	-1.8365	4.68073e-19
-	CLJU_c25080	sulfatase	65	211	1.69873	1.37741e-40
-	CLJU_c25130	transcriptional regulator	123	288	1.22741	9.37198e-14
-	CLJU_c25180	hypothetical protein	65	3	-4.43741	0
-	CLJU_c25190	hypothetical protein	88	4	-4.45943	0
carB2	CLJU_c25210	carbamoyl-phosphate synthase large subunit	4196	1140	-1.87998	1.68526e-38
carA2	CLJU_c25220	carbamoyl-phosphate synthase small subunit	3035	1101	-1.46288	2.39904e-07
argF2	CLJU_c25230	ornithine carbamoyltransferase	2936	1051	-1.48209	1.29825e-07
-	CLJU_c25530	hypothetical protein	475	122	-1.96105	2.83344e-27
-	CLJU_c25540	hypothetical protein	37	128	1.79055	1.02163e-38
-	CLJU_c25560	membrane-bound histidine kinase	10	28	1.48543	4.88356e-21
-	CLJU_c25570	hypothetical protein	12	42	1.80735	5.34965e-27
-	CLJU_c25600	hypothetical protein	263	119	-1.1441	5.68679e-06
-	CLJU_c25920	hypothetical protein	167	27	-2.62882	1.10833e-87
-	CLJU_c25930	hypothetical protein	58	11	-2.39855	3.99875e-67
tal1	CLJU_c25960	transaldolase	23	74	1.68589	2.38155e-34
pflB2	CLJU_c25980	pyruvate formate-lyase	6	31	2.36923	8.6368e-81
-	CLJU_c25990	hypothetical protein	1	25	4.64386	0
-	CLJU_c26000	hypothetical protein	2	37	4.20945	0
-	CLJU_c26110	amidohydrolase	15	35	1.22239	3.98256e-14
adeC	CLJU_c26120	adenine deaminase	13	29	1.15754	2.69472e-13
-	CLJU_c26130	ABC transporter substrate-binding protein	140	361	1.36657	7.55581e-22
-	CLJU_c26240	transport protein ATPase/permease	26	1	-4.70044	0
-	CLJU_c26300	extracellular solute-binding protein	5	23	2.20163	8.09458e-65
-	CLJU_c26350	NADPH-dependent FMN reductase	23	58	1.33442	2.65026e-16
-	CLJU_c26360	transcriptional regulator	8	21	1.39232	1.51309e-10
-	CLJU_c26460	transcriptional regulator	13	31	1.25376	7.70692e-15
-	CLJU_c26490	RNA polymerase sigma factor	35	7	-2.32193	5.00317e-39
-	CLJU_c26500	hypothetical protein	57	18	-1.66297	2.10712e-18
-	CLJU_c26680	hypothetical protein	52	123	1.24207	2.57041e-13
-	CLJU_c27020	integrase/recombinase	103	207	1.00699	9.00498e-10
-	CLJU_c27030	Fe-S oxidoreductase	115	452	1.97469	1.18619e-64
-	CLJU_c27080	AP endonuclease	23	11	-1.06413	0.000304657
-	CLJU_c27210	acetyltransferase	114	6	-4.24793	0
-	CLJU_c27260	hybrid cluster protein	9	33	1.87447	6.92222e-38
-	CLJU_c27290	glycine reductase complex component C subunit alpha	59	24	-1.29768	2.04479e-07
-	CLJU_c27300	glycine reductase complex component C subunit beta	91	29	-1.64981	2.50727e-17
-	CLJU_c27310	glycine/sarcosine/betaine reductase complex component A2	47	10	-2.23266	3.46419e-38
-	CLJU_c27320	thioredoxin	70	14	-2.32193	3.46189e-49
-	CLJU_c27330	thioredoxin reductase	62	12	-2.36923	6.13341e-69
-	CLJU_c27340	choline/carnitine/betaine transporter protein	32	7	-2.19265	5.09177e-49
-	CLJU_c27350	glycine reductase complex component B subunit gamma	67	9	-2.89616	4.99923e-130
-	CLJU_c27360	glycine/sarcosine/betaine reductase component B subunit alpha	31	5	-2.63227	3.37853e-89
-	CLJU_c27570	hypothetical protein	31	74	1.25526	9.97086e-15
-	CLJU_c27610	bifunctional cystathionine gamma-lyase/maltose regulon repressor	38	16	-1.24793	1.28524e-06
-	CLJU_c27620	ABC transporter periplasmic solute-binding component	33	16	-1.04439	1.26534e-05
-	CLJU_c27640	polar amino acid ABC transporter ATPase	26	10	-1.37851	5.51486e-08
-	CLJU_c27650	mandelate racemase	43	21	-1.03395	0.000848233
-	CLJU_c27670	metal ion ABC transporter permease	30	15	-1	8.82301e-05
-	CLJU_c27830	betaine reductase complex component B subunit gamma	24	11	-1.12553	1.18622e-05
-	CLJU_c27860	permease	24	6	-2	2.17556e-25
-	CLJU_c27870	hypothetical protein	99	2	-5.62936	0
-	CLJU_c27880	hypothetical protein	154	2	-6.26679	0
-	CLJU_c27890	hypothetical protein	678	49	-3.79043	0
-	CLJU_c27900	hydantoinase	1182	68	-4.11955	0
-	CLJU_c27910	hypothetical protein	1237	61	-4.34189	0
-	CLJU_c27920	hypothetical protein	1140	56	-4.34746	0
-	CLJU_c27930	NAD(P)H-flavin oxidoreductase	357	12	-4.89482	0
-	CLJU_c27940	purine permease	1085	43	-4.65721	0
-	CLJU_c27950	carbon-nitrogen family hydrolase	1132	52	-4.44422	0
-	CLJU_c28090	2-hydroxy-3-oxopropionate reductase	99	263	1.40956	2.22022e-24
-	CLJU_c28110	glycerate kinase	14	32	1.19265	2.70257e-13
-	CLJU_c28130	glucarate dehydratase	13	35	1.42884	1.97917e-21
-	CLJU_c28170	glucarate dehydratase	15	38	1.34104	2.73624e-16
-	CLJU_c28180	hypothetical protein	8	23	1.52356	4.15981e-17
-	CLJU_c28210	aldo/keto reductase	26	54	1.05445	1.11293e-10
-	CLJU_c28270	hypothetical protein	7	42	2.58496	1.13946e-88
-	CLJU_c28290	diguanylate cyclase	183	56	-1.70834	9.38061e-20
-	CLJU_c28300	hypothetical protein	252	84	-1.58496	8.63367e-17
-	CLJU_c28310	hypothetical protein	112	41	-1.4498	9.47968e-12
-	CLJU_c28320	hypothetical protein	285	106	-1.4269	1.68249e-10
-	CLJU_c28430	hypothetical protein	178	84	-1.08342	2.92314e-07
trnL1	CLJU_c28440	Leu tRNA	812	278	-1.54639	8.77036e-12
-	CLJU_c28530	signal transduction protein	162	67	-1.27376	1.21611e-07
aroE1	CLJU_c28750	shikimate 5-dehydrogenase	35	198	2.50007	1.03599e-110
aroD	CLJU_c28760	3-dehydroquinate dehydratase	16	94	2.55459	8.91322e-149
-	CLJU_c28930	hypothetical protein	73	25	-1.54597	1.83118e-12
-	CLJU_c28940	ABC transporter ATPase	102	44	-1.21299	1.37297e-06
-	CLJU_c28950	amino acid ABC transporter permease	120	43	-1.48063	2.37195e-10
-	CLJU_c28960	ABC transporter periplasmic solute-binding component	125	36	-1.79586	4.83288e-20
-	CLJU_c29050	fructose-1,6-bisphosphatase	88	440	2.32193	1.80278e-104
-	CLJU_c29070	cation-transporting ATPase	20	109	2.44626	2.94311e-112
aroF	CLJU_c29180	phospho-2-dehydro-3-deoxyheptonate aldolase	1633	3534	1.11378	2.04992e-08
-	CLJU_c29190	hypothetical protein	19	55	1.53343	1.29061e-15
-	CLJU_c29240	ACT domain-containing protein	104	33	-1.65605	2.00744e-17
-	CLJU_c29250	hypothetical protein	267	100	-1.41684	4.25457e-13
-	CLJU_c29260	hypothetical protein	137	67	-1.03194	6.57862e-05
-	CLJU_c29270	methyl-accepting chemotaxis protein	92	45	-1.03171	0.000215555
-	CLJU_c29360	polygalacturonase	6	66	3.45943	0
-	CLJU_c29370	ATP-binding protein	146	70	-1.06054	0.000182838
-	CLJU_c29590	hypothetical protein	10	55	2.45943	8.09412e-93
pepQ2	CLJU_c29640	Xaa-Pro dipeptidase	52	175	1.75077	1.58382e-38
-	CLJU_c30040	signal receiver domain-containing protein	80	27	-1.56704	1.30452e-15
-	CLJU_c30050	sensor histidine kinase/response regulator hybrid	174	72	-1.27302	6.41304e-11
-	CLJU_c30110	hypothetical protein	21	43	1.03395	2.24368e-09
-	CLJU_c30220	multimeric flavodoxin WrbA-like protein	21	48	1.19265	3.16227e-13
-	CLJU_c30230	hypothetical protein	9	26	1.53051	2.0555e-19
-	CLJU_c30550	acetyltransferase	86	39	-1.14086	3.3457e-05
-	CLJU_c30560	methyl-accepting chemotaxis protein	120	58	-1.04891	2.65473e-06
-	CLJU_c30610	D-isomer specific 2-hydroxyacid dehydrogenase	376	68	-2.46713	1.55848e-80
-	CLJU_c30810	non-heme chloroperoxidase	4	28	2.80735	1.61862e-128
-	CLJU_c30930	hypothetical protein	20	44	1.1375	9.6194e-11
-	CLJU_c30950	hypothetical protein	28	65	1.21501	4.16687e-13
-	CLJU_c31240	hypothetical protein	24	5	-2.26303	1.29104e-28
-	CLJU_c31270	hypothetical protein	34	11	-1.62803	1.93489e-13
-	CLJU_c31290	hypothetical protein	28	6	-2.22239	1.44611e-36
-	CLJU_c31310	phage-like protein	20	6	-1.73697	2.74071e-15
-	CLJU_c31330	phage-like protein	43	10	-2.10434	3.43843e-36
-	CLJU_c31440	hypothetical protein	26	7	-1.89308	3.04871e-17
-	CLJU_c31470	hypothetical protein	82	30	-1.45066	8.81978e-10
-	CLJU_c31480	phage-like protein	90	38	-1.24393	2.318e-07
-	CLJU_c31490	phage-like protein	29	3	-3.27302	1.3934e-100
-	CLJU_c31520	hypothetical protein	55	22	-1.32193	5.71816e-09
-	CLJU_c31550	transcriptional regulator	68	145	1.09245	1.55916e-11
-	CLJU_c31580	hypothetical protein	40	11	-1.8625	1.4579e-23
-	CLJU_c31590	phage-like protein	51	14	-1.86507	9.19014e-22
-	CLJU_c31600	hypothetical protein	41	11	-1.89812	4.00884e-22
-	CLJU_c31610	phage replication protein	46	12	-1.9386	3.10483e-30
-	CLJU_c31620	phage-like hydrolase	26	5	-2.37851	2.04547e-36
-	CLJU_c31630	phage-like protein	44	12	-1.87447	2.81196e-29
-	CLJU_c31640	phage-like protein	45	14	-1.6845	4.83519e-15
-	CLJU_c31650	hypothetical protein	60	13	-2.20645	8.16822e-31
-	CLJU_c31660	hypothetical protein	47	16	-1.55459	2.04416e-09
-	CLJU_c31670	hypothetical protein	49	17	-1.52725	3.54202e-10
-	CLJU_c31680	hypothetical protein	52	19	-1.45251	1.31962e-10
-	CLJU_c31690	hypothetical protein	24	10	-1.26303	1.19351e-05
-	CLJU_c31700	hypothetical protein	46	14	-1.71621	2.53907e-18
-	CLJU_c31710	transcriptional regulator	78	23	-1.76184	1.36873e-20
hemB	CLJU_c31960	delta-aminolevulinic acid dehydratase	495	1040	1.07108	4.03171e-10
-	CLJU_c32100	metal ion ABC transporter periplasmic protein	184	77	-1.25678	8.89311e-08
ddl	CLJU_c32110	D-alanine--D-alanine ligase	25	247	3.30451	0
alr2	CLJU_c32120	alanine racemase	33	269	3.02707	2.79426e-273
-	CLJU_c32210	hypothetical protein	10	34	1.76553	3.06363e-33
-	CLJU_c32290	hypothetical protein	542	258	-1.07092	1.71512e-05
-	CLJU_c32450	hypothetical protein	13	30	1.20645	1.02066e-13
-	CLJU_c32730	AbiF-like protein	44	18	-1.28951	1.30324e-08
trnL2	CLJU_c32740	Leu tRNA	7	29	2.05063	8.86534e-22
-	CLJU_c32880	two-component response regulator	57	28	-1.02554	0.000557209
-	CLJU_c32890	aspartate kinase	7	91	3.70044	0
clpP1	CLJU_c32940	ATP-dependent Clp protease proteolytic subunit	76	267	1.81277	7.02116e-39
-	CLJU_c32950	transcriptional regulator	17	86	2.3388	1.79235e-99
-	CLJU_c32960	two-component sensor kinase	60	122	1.02385	5.27671e-12
-	CLJU_c32970	two-component response regulator	14	36	1.36257	1.68233e-18
-	CLJU_c33160	ATP-dependent exonuclease	78	38	-1.03747	1.49711e-05
-	CLJU_c33170	signal transduction protein	123	61	-1.01178	0.00025178
cbiM2	CLJU_c33200	cobalt transport protein CbiM	1343	7118	2.40601	1.73616e-77
lipA	CLJU_c33210	lipoyl synthase	91	182	1	5.98981e-11
sdhA	CLJU_c33250	L-serine dehydratase subunit alpha	34	79	1.21632	3.5954e-11
sdhB	CLJU_c33260	L-serine dehydratase subunit beta	56	162	1.5325	4.1466e-22
-	CLJU_c33310	permease	35	222	2.66513	1.11537e-148
-	CLJU_c33320	hypothetical protein	21	126	2.58496	2.82915e-149
-	CLJU_c33760	Fe-S oxidoreductase	287	138	-1.05638	3.35256e-06
-	CLJU_c33900	hypothetical protein	126	29	-2.1193	2.83401e-34
-	CLJU_c33910	GTP-binding protein	109	46	-1.24462	1.26086e-08
-	CLJU_c33940	bifunctional transglycosylase/transpeptidase	228	111	-1.03847	8.46678e-07
-	CLJU_c34010	UDP-N-acetyl-D-mannosaminuronic acid transferase	222	107	-1.05295	3.0039e-05
-	CLJU_c34270	hypothetical protein	34	75	1.14136	4.39864e-12
-	CLJU_c34360	FMN-dependent alpha-hydroxy acid dehydrogenase	98	198	1.01465	4.56561e-12
dapB2	CLJU_c34550	dihydrodipicolinate reductase	807	293	-1.46167	1.02781e-15
dapA2	CLJU_c34560	dihydrodipicolinate synthase	1162	386	-1.58994	4.38216e-21
asd	CLJU_c34570	aspartate-semialdehyde dehydrogenase	1028	443	-1.21446	3.08153e-10
-	CLJU_c34590	S-adenosylmethionine-dependent methyltransferase	90	45	-1	0.000284441
dapD	CLJU_c34610	2,3,4,5-tetrahydropyridine-2,6-dicarboxylate N-succinyltransferase	1019	427	-1.25485	2.54731e-10
ssb2	CLJU_c34620	single stranded DNA-binding protein	79	314	1.99084	7.87636e-59
-	CLJU_c34630	hypothetical protein	32	139	2.11894	1.3047e-68
-	CLJU_c34670	hypothetical protein	45	108	1.26303	1.187e-17
-	CLJU_c34820	PadR family transcriptional regulator	52	23	-1.17688	3.62627e-06
-	CLJU_c34870	sugar ABC transporter periplasmic protein	27	55	1.02647	3.1228e-09
-	CLJU_c34880	CDP-alcohol phosphatidyltransferase	12	60	2.32193	1.6477e-85
-	CLJU_c34890	flavodoxin	56	217	1.9542	3.88978e-44
-	CLJU_c34900	transcriptional regulator	45	175	1.95936	8.57864e-47
-	CLJU_c34990	hypothetical protein	55	26	-1.08092	7.76581e-06
-	CLJU_c35040	acetyltransferase	46	467	3.34372	0
-	CLJU_c35070	transcriptional regulator	12	29	1.27302	2.31572e-15
-	CLJU_c35080	acetyltransferase	17	44	1.37197	3.13093e-17
-	CLJU_c35100	hypothetical protein	175	609	1.79909	4.86499e-38
-	CLJU_c35110	acetyltransferase	43	258	2.58496	1.01711e-153
-	CLJU_c35120	hypothetical protein	59	365	2.62911	1.7638e-140
-	CLJU_c35130	PadR family transcriptional regulator	240	1585	2.72338	3.488e-226
-	CLJU_c35160	cell wall-binding protein	54	1	-5.75489	0
-	CLJU_c35220	hypothetical protein	14	36	1.36257	8.03316e-17
-	CLJU_c35230	beta-lactamase	223	110	-1.01954	3.5059e-06
-	CLJU_c35290	transcriptional regulator	28	64	1.19265	4.01623e-15
-	CLJU_c35480	divalent cation transporter	24	5	-2.26303	4.55965e-35
-	CLJU_c35510	thiamine biosynthesis protein	74	162	1.1304	1.41243e-13
cobS	CLJU_c35530	cobalamin synthase	48	118	1.29768	1.83647e-14
-	CLJU_c35580	transcriptional regulator	25	12	-1.05889	8.94009e-05
pyrD	CLJU_c35690	dihydroorotate dehydrogenase	49	22	-1.15528	3.54414e-06
pyrK	CLJU_c35700	dihydroorotate dehydrogenase electron transfer subunit	63	30	-1.07039	0.000133953
pyrF	CLJU_c35710	orotidine 5'-phosphate decarboxylase	37	15	-1.30256	1.36846e-08
pyrB	CLJU_c35730	aspartate carbamoyltransferase catalytic subunit	48	13	-1.88452	1.77861e-30
-	CLJU_c35770	transporter	319	159	-1.00453	7.00613e-06
-	CLJU_c36060	hypothetical protein	26	460	4.14505	0
-	CLJU_c36090	hemerythrin-like protein	67	18	-1.89616	2.17099e-27
-	CLJU_c36210	nitroreductase	77	24	-1.68182	5.03334e-19
-	CLJU_c36260	SAM-dependent methyltransferase	118	27	-2.12776	1.28964e-37
-	CLJU_c36270	hypothetical protein	343	33	-3.37767	3.00607e-246
-	CLJU_c36280	hypothetical protein	132	11	-3.58496	4.16822e-262
-	CLJU_c36290	Na+/H+ antiporter	64	5	-3.67807	0
-	CLJU_c36370	hypothetical protein	53	117	1.14244	1.36903e-13
-	CLJU_c36540	hypothetical protein	37	74	1	3.25938e-09
-	CLJU_c36550	phage related DNA polymerase	22	9	-1.28951	2.84656e-07
-	CLJU_c36560	phage-like protein	53	25	-1.08406	5.8392e-06
-	CLJU_c36570	phage-like protein	27	13	-1.05445	8.74553e-05
-	CLJU_c36580	hypothetical protein	63	18	-1.80735	5.11736e-23
-	CLJU_c36590	hypothetical protein	94	15	-2.6477	2.06406e-84
-	CLJU_c36600	hypothetical protein	61	9	-2.76081	6.51605e-71
-	CLJU_c36610	hypothetical protein	51	5	-3.3505	1.93019e-240
-	CLJU_c36620	RNA polymerase sigma factor	200	13	-3.94342	0
-	CLJU_c36630	hypothetical protein	31	4	-2.9542	7.98212e-62
-	CLJU_c36640	hypothetical protein	57	3	-4.24793	0
rha	CLJU_c36650	phage regulatory protein	78	11	-2.82597	3.33943e-122
-	CLJU_c36660	transcriptional regulator	44	13	-1.75899	3.99599e-13
trnG3	CLJU_c36740	Gly tRNA	176	399	1.18081	5.95929e-14
trnQ3	CLJU_c36780	Gln tRNA	1169	2492	1.09203	1.03084e-13
trnH	CLJU_c36790	His tRNA	439	1209	1.46152	1.71214e-19
trnK5	CLJU_c36800	Lys tRNA	435	1223	1.49134	1.88118e-20
trnR5	CLJU_c36810	Arg tRNA	703	2239	1.67126	2.86956e-33
trnG5	CLJU_c36820	Gly tRNA	451	1280	1.50494	5.42403e-21
-	CLJU_c37010	transglycosylase	428	151	-1.50306	1.09738e-14
-	CLJU_c37140	methyl-accepting transducer	92	29	-1.66558	4.85245e-17
guaA	CLJU_c37170	GMP synthase	2649	1063	-1.31731	3.41816e-08
guaB	CLJU_c37180	inosine-5'-monophosphate dehydrogenase	1929	756	-1.3514	4.62396e-06
groL	CLJU_c37190	60 kDa chaperonin	1206	4769	1.98346	5.13597e-42
groS	CLJU_c37200	10 kDa chaperonin	683	3023	2.14602	1.73351e-61
-	CLJU_c37230	8-oxoguanine DNA glycosylase	97	36	-1.42999	4.42153e-10
-	CLJU_c37340	carbon starvation protein A	6	146	4.60486	0
-	CLJU_c37350	carbon starvation protein A	5	28	2.48543	9.80537e-109
gcp	CLJU_c37400	O-sialoglycoprotein endopeptidase	19	79	2.05585	2.33771e-62
-	CLJU_c37460	hypothetical protein	213	86	-1.30844	3.6077e-08
-	CLJU_c37480	glycerol-3-phosphate dehydrogenase	69	26	-1.40808	1.53067e-10
codH	CLJU_c37670	carbon monoxide dehydrogenase	4491	2149	-1.06337	1.26805e-08
-	CLJU_c37690	dinitrogenase iron-molybdenum cofactor biosynthesis protein	441	211	-1.06354	2.26989e-05
fur5	CLJU_c37710	ferric uptake regulator	62	25	-1.31034	1.37552e-09
-	CLJU_c37720	dinitrogenase iron-molybdenum cofactor biosynthesis protein	244	61	-2	1.71002e-27
-	CLJU_c37730	ATP-binding protein	35	8	-2.12928	5.93805e-36
-	CLJU_c37740	ATP-binding protein	48	7	-2.77761	3.55792e-97
-	CLJU_c37750	dinitrogenase iron-molybdenum cofactor biosynthesis protein	61	9	-2.76081	3.81964e-82
-	CLJU_c37770	hypothetical protein	8	50	2.64386	1.828e-110
-	CLJU_c37830	CODH nickel-insertion accessory protein	190	5566	4.87257	0
-	CLJU_c37840	dTDP-4-dehydrorhamnose 3,5 epimerase	156	4774	4.93558	0
-	CLJU_c37850	FMN-binding protein	207	6666	5.00912	0
-	CLJU_c37880	metal-binding protein	54	16	-1.75489	4.29968e-22
-	CLJU_c37950	hypothetical protein	149	612	2.03822	2.75456e-62
-	CLJU_c37960	hypothetical protein	33	124	1.9098	8.91854e-46
-	CLJU_c37970	hypothetical protein	58	195	1.74935	2.02892e-31
-	CLJU_c37980	hypothetical protein	32	208	2.70044	5.12346e-184
-	CLJU_c37990	hypothetical protein	20	135	2.75489	2.12111e-217
hemV1	CLJU_c38000	metal ion (Fe 3+) ABC transporter ATPase	112	944	3.07529	0
-	CLJU_c38010	hypothetical protein	366	757	1.04845	5.13003e-12
hemV2	CLJU_c38020	metal ion (Fe 3+) ABC transporter ATPase	202	592	1.55124	3.85645e-19
-	CLJU_c38030	iron ABC transporter ATPase	228	893	1.96963	2.5086e-59
-	CLJU_c38040	iron ABC transporter permease	159	518	1.70393	3.21988e-38
-	CLJU_c38050	methyltransferase	332	981	1.56307	2.55542e-24
-	CLJU_c38060	formylmethanofuran dehydrogenase subunit E	639	2146	1.74776	3.48329e-40
-	CLJU_c38070	nicotinate-nucleotide diphosphorylase	32	85	1.40939	5.31454e-18
-	CLJU_c38080	ABC transporter ATPase	32	104	1.70044	4.45632e-34
modC	CLJU_c38090	molybdate ABC transporter permease	20	69	1.7866	3.6288e-38
modA2	CLJU_c38100	molybdate ABC transporter periplasmic protein	52	140	1.42884	7.06095e-19
-	CLJU_c38110	hypothetical protein	11	30	1.44746	9.82566e-19
-	CLJU_c38180	ATPase	38	76	1	1.58428e-09
-	CLJU_c38190	protease	30	70	1.22239	1.41283e-14
-	CLJU_c38200	acetyltransferase	52	145	1.47947	4.95849e-22
-	CLJU_c38220	hypothetical protein	66	20	-1.72247	1.68045e-18
-	CLJU_c38250	hypothetical protein	28	77	1.45943	6.08372e-22
-	CLJU_c38260	phosphatase	17	42	1.30485	2.82148e-16
proS	CLJU_c38360	prolyl-tRNA synthetase	156	336	1.10692	3.11611e-08
-	CLJU_c38710	membrane-associated protein	31	67	1.11189	5.21721e-13
-	CLJU_c38720	penicillinase repressor	52	175	1.75077	1.37974e-37
-	CLJU_c38820	hydrolase	51	6	-3.08746	5.45722e-158
-	CLJU_c38950	dehydrogenase	32	1	-5	0
-	CLJU_c38960	amino acid permease	22	1	-4.45943	0
-	CLJU_c39000	MarR family transcriptional regulator	189	23	-3.03868	7.46794e-195
-	CLJU_c39010	acetyltransferase	66	8	-3.04439	6.42534e-157
-	CLJU_c39020	HD-superfamily hydrolase	93	18	-2.36923	2.25018e-58
-	CLJU_c39110	enolase	1021	3786	1.89069	3.5732e-32
-	CLJU_c39120	2,3-bisphosphoglycerate-independent phosphoglycerate mutase	595	2237	1.9106	4.87686e-27
tim	CLJU_c39130	triosephosphate isomerase	1106	4491	2.02169	9.78835e-38
-	CLJU_c39140	phosphoglycerate kinase	866	4442	2.35877	8.65795e-60
gap	CLJU_c39150	glyceraldehyde-3-phosphate dehydrogenase	967	6611	2.77328	1.79074e-118
-	CLJU_c39160	transcriptional regulator	370	2093	2.49998	1.90727e-135
-	CLJU_c39170	RNA polymerase sigma-54 factor	41	92	1.16601	8.80576e-13
-	CLJU_c39190	rRNA methylase	88	186	1.07973	7.94113e-10
-	CLJU_c39210	hypothetical protein	55	201	1.86969	5.57064e-38
trnL5	CLJU_c39240	Leu tRNA	46	101	1.13465	2.23691e-09
cinA	CLJU_c39260	competence-damage inducible protein	138	324	1.23133	8.47119e-16
cysE	CLJU_c39300	serine acetyltransferase	17	35	1.04182	1.09939e-10
-	CLJU_c39310	cysteine synthase	27	96	1.83007	3.86578e-38
-	CLJU_c39330	hypothetical protein	1153	422	-1.45008	6.99629e-14
-	CLJU_c39440	acyl-CoA dehydrogenase	14	40	1.51457	2.60376e-24
-	CLJU_c39570	transporter protein	11	158	3.84435	0
pdxS	CLJU_c39580	pyridoxal biosynthesis protein PdxS	14	95	2.7625	1.76508e-203
pdxT	CLJU_c39590	glutamine amidotransferase subunit PdxT	9	65	2.85244	2.01857e-220
-	CLJU_c39710	microcompartment protein	40	80	1	1.81381e-10
-	CLJU_c39730	acetaldehyde dehydrogenase	16	33	1.04439	3.20292e-09
-	CLJU_c39860	microcompartment shellprotein	21	9	-1.22239	0.000426026
adh2	CLJU_c39950	NADPH-dependent butanol dehydrogenase	90	30	-1.58496	3.13854e-14
-	CLJU_c40060	ABC transporter ATPase	166	14	-3.56768	0
-	CLJU_c40350	Na+/H+ antiporter	12	1187	6.62814	0
-	CLJU_c40360	threonine synthase	19	1776	6.54649	0
-	CLJU_c40370	endoribonuclease L-PSP	116	7187	5.95319	0
alr3	CLJU_c40390	alanine racemase	6	232	5.27302	0
-	CLJU_c40400	hypothetical protein	6	588	6.61471	0
glmS	CLJU_c40420	glucosamine--fructose-6-phosphate aminotransferase	126	512	2.02272	1.54464e-45
glmM	CLJU_c40440	phosphoglucosamine mutase	143	341	1.25376	2.88887e-12
-	CLJU_c40450	FAD dependent dehydrogenase	62	256	2.0458	3.63081e-77
-	CLJU_c40460	hypothetical protein	46	158	1.78022	2.76891e-41
-	CLJU_c40470	hypothetical protein	43	117	1.4441	1.03399e-18
mutL2	CLJU_c40630	glutamate mutase	926	464	-0.996887	7.35575e-06
mutS4	CLJU_c40640	glutamate mutase	1241	540	-1.20047	1.59534e-09
-	CLJU_c40650	regulatory protein	931	228	-2.02975	8.86452e-46
-	CLJU_c40680	glutamine amidotransferase	3	80	4.73697	0
clpA2	CLJU_c41330	ATPase	188	499	1.40831	1.51303e-18
-	CLJU_c41340	ATP:guanido phosphotransferase-like protein	109	319	1.54923	2.57791e-31
-	CLJU_c41350	UvrB/UvrC domain-containing protein	82	254	1.63113	6.29338e-28
trnM6	CLJU_c41600	Met tRNA	308	691	1.16576	4.01116e-13
trnL7	CLJU_c41610	Leu tRNA	311	620	0.995354	3.505e-08
-	CLJU_c41660	S4 domain-containing protein	348	174	-1	0.000213875
mfd	CLJU_c41720	transcription-repair coupling factor	42	129	1.61891	1.29947e-35
pth	CLJU_c41730	peptidyl-tRNA hydrolase	75	191	1.34861	1.90471e-16
-	CLJU_c41740	serine protease	280	701	1.32399	3.19469e-19
-	CLJU_c41790	stage V sporulation protein G	2342	978	-1.25983	1.15241e-10
comB	CLJU_c41880	2-phosphosulfolactate phosphatase	32	64	1	1.07763e-09
murI	CLJU_c41940	glutamate racemase	44	108	1.29546	1.96442e-14
purA	CLJU_c42350	adenylosuccinate synthase	252	972	1.94753	1.52499e-55
-	CLJU_c42360	dehydrogenase	141	489	1.79414	6.70176e-32
-	CLJU_c42490	agmatine deiminase	3	25	3.05889	2.81023e-246
-	CLJU_c42510	transcriptional regulator	3	41	3.77259	0
-	CLJU_c42550	carbamate kinase	7	110	3.974	0
-	CLJU_c42560	ornithine carbamoyltransferase	10	159	3.99095	0
-	CLJU_c42640	methyl-accepting chemotaxis sensory transducer	23	68	1.5639	2.19582e-25
hsp18a	CLJU_c42690	heat shock protein	58	285	2.29684	1.16334e-83
hsp18b	CLJU_c42700	heat shock protein	30	161	2.42403	9.95177e-115
parA	CLJU_c42880	chromosome partitioning protein	90	205	1.18763	3.49839e-15
